# Supplementary material
Source: PubMed Central journal article supplement (PMC11585083)
Supplement: NIHMS2032938-supplement-1.pdf [file NIHMS2032938-supplement-1.pdf]

**Supplemental Table 1: Selected demographic, business, and storage information among  
firearm retailers/ranges, by state (N=138)**

| <b>Retailer/range variable [N (%)]</b> | <b>N with data present</b> | <b>Overall (N = 138)</b> | <b>Colorado (N = 99)</b> | <b>Washington (N = 39)</b> | <b>p value</b> |
|----------------------------------------|----------------------------|--------------------------|--------------------------|----------------------------|----------------|
| Role in business                       | 138                        |                          |                          |                            | 0.304          |
| Owner / Co-owner                       |                            | 78 (56.5%)               | 59 (59.6%)               | 19 (48.7%)                 |                |
| Manager                                |                            | 24 (17.4%)               | 15 (15.2%)               | 9 (23.1%)                  |                |
| Both                                   |                            | 28 (20.3%)               | 21 (21.2%)               | 7 (17.9%)                  |                |
| Other                                  |                            | 8 (5.8%)                 | 4 (4.0%)                 | 4 (10.3%)                  |                |
| Number of employees at location        | 138                        |                          |                          |                            | 0.005          |
| 5 or fewer                             |                            | 101 (73.2%)              | 80 (80.8%)               | 21 (53.8%)                 |                |
| 6-11                                   |                            | 20 (14.5%)               | 12 (12.1%)               | 8 (20.5%)                  |                |
| 12-19                                  |                            | 8 (5.8%)                 | 4 (4.0%)                 | 4 (10.3%)                  |                |
| 20 or more                             |                            | 9 (6.5%)                 | 3 (3.0%)                 | 6 (15.4%)                  |                |

|                                                                                                                                                  |     |            |            |            |       |
|--------------------------------------------------------------------------------------------------------------------------------------------------|-----|------------|------------|------------|-------|
| Currently offers temporary firearm storage at request                                                                                            | 137 |            |            |            | 0.515 |
| Yes                                                                                                                                              |     | 49 (35.5%) | 38 (38.4%) | 11 (28.2%) |       |
| No                                                                                                                                               |     | 88 (63.8%) | 60 (60.6%) | 28 (71.8%) |       |
| Has ever offered temporary firearm storage at request                                                                                            | 137 |            |            |            | 0.463 |
| Yes                                                                                                                                              |     | 57 (41.3%) | 44 (44.4%) | 13 (33.3%) |       |
| No                                                                                                                                               |     | 80 (58.0%) | 54 (54.5%) | 26 (66.7%) |       |
| Has ever provided firearm storage when individual subject to a court order                                                                       | 96  |            |            |            | -     |
| Yes                                                                                                                                              |     | 28 (28.3%) | 28 (28.3%) | -          |       |
| No                                                                                                                                               |     | 68 (68.7%) | 68 (68.7%) | -          |       |
| How frequently did you receive requests for firearm storage in the past 12 months for any reason (whether or not you agreed to provide storage)? | 138 |            |            |            | 0.284 |
| More than 20 requests                                                                                                                            |     | 5 (3.6%)   | 3 (3.0%)   | 2 (5.1%)   |       |
| 10-20 requests                                                                                                                                   |     | 3 (2.2%)   | 2 (2.0%)   | 1 (2.6%)   |       |
| 3-9 requests                                                                                                                                     |     | 18 (13.0%) | 10 (10.1%) | 8 (20.5%)  |       |
| 1-2 requests                                                                                                                                     |     | 31 (22.5%) | 21 (21.2%) | 10 (25.6%) |       |
| No requests in the past 12 months but we have received at least one request in the past                                                          |     | 32 (23.2%) | 23 (23.2%) | 9 (23.1%)  |       |
| We have never received a request                                                                                                                 |     | 49 (35.5%) | 40 (40.4%) | 9 (23.1%)  |       |
| How did COVID-19 affect your business operations in 2020?^                                                                                       |     |            |            |            |       |
| Sales have increased                                                                                                                             | 138 | 86 (62.3%) | 62 (62.6%) | 24 (61.5%) | 1     |
| Sales have decreased                                                                                                                             | 138 | 28 (20.3%) | 20 (20.2%) | 8 (20.5%)  | 1     |
| Problems with inventory for firearms                                                                                                             | 138 | 84 (60.9%) | 57 (57.6%) | 27 (69.2%) | 0.247 |
| Problems with inventory for ammunition                                                                                                           | 138 | 95 (68.8%) | 64 (64.6%) | 31 (79.5%) | 0.105 |
| Had to reduce our staffing                                                                                                                       | 138 | 10 (7.2%)  | 7 (7.1%)   | 3 (7.7%)   | 1     |
| Had to increase our staffing                                                                                                                     | 138 | 13 (9.4%)  | 9 (9.1%)   | 4 (10.3%)  | 1     |
| Concerns about ability to stay in business                                                                                                       | 138 | 28 (20.3%) | 17 (17.2%) | 11 (28.2%) | 0.163 |
| Delayed making changes, such as new programs or policies                                                                                         | 138 | 25 (18.1%) | 15 (15.2%) | 10 (25.6%) | 0.218 |
| Training programs have increased                                                                                                                 | 138 | 26 (18.8%) | 18 (18.2%) | 8 (20.5%)  | 0.810 |
| Trainings programs have decreased                                                                                                                | 138 | 13 (9.4%)  | 7 (7.1%)   | 6 (15.4%)  | 0.192 |

^Responses may add up to >100% because participants could select all that applied.
